# Supplementary material
Source: PubMed Central journal article supplement (PMC8299295)
Supplement: NIHMS1662640-supplement-supplementary.pdf [file NIHMS1662640-supplement-supplementary.pdf]

## Supplementary Material

**Table 1. Demographic Characteristics of Post-ACOG Patients Not Prescribed Aspirin vs Prescribed Aspirin**

|                    | Post-ACOG (n=203)                         |                                        | P-value      |
|--------------------|-------------------------------------------|----------------------------------------|--------------|
|                    | Not Prescribed Aspirin<br>(n = 61)<br>30% | Prescribed Aspirin<br>(n = 142)<br>70% |              |
| Maternal age       | 30.1 +/- 6.10                             | 32.7 +/- 6.07                          | <b>0.007</b> |
| Race               |                                           |                                        |              |
| • African American | 35 (57.4)                                 | 93 (65.5)                              | 0.34         |
| • White            | 16 (26.2)                                 | 30 (21.1)                              | 0.47         |
| • Hispanic         | 4 (6.6)                                   | 9 (6.3)                                | 1.00         |
| • Asian            | 0 (0)                                     | 7 (4.9)                                | 0.11         |
| • Other            | 6 (9.8)                                   | 3 (2.1)                                | 0.02         |
| Gravida            | 4.05 +/- 2.95                             | 3.96 +/- 2.60                          | 0.84         |
| Nulliparous        | 16 (26.2)                                 | 37 (26.0)                              | 1.0          |
| Preterm birth      | 13 (21.3)                                 | 47 (33.1)                              | 0.10         |
| BMI                | 33.39 +/- 8.60                            | 35.5 +/- 8.07                          | 0.09         |
| Obesity (BMI > 30) | 39 (63.9)                                 | 102 (71.8)                             | 0.52         |

|                                      |           |           |                 |
|--------------------------------------|-----------|-----------|-----------------|
| History of preeclampsia              | 8 (13.1)  | 53 (37.3) | <b>&lt;0.01</b> |
| Pregestational diabetes              | 7 (11.5)  | 22 (15.5) | 0.52            |
| Thyroid disorders                    | 3 (4.91)  | 7 (4.9)   | 1.0             |
| Antiphospholipid syndrome            | 0         | 0         | -               |
| Autoimmune disorder                  | 1 (1.64)  | 4 (2.8)   | 1.0             |
| Vascular disease                     | 1 (1.64)  | 0         | -               |
| Sickle cell disease                  | 0         | 1 (0.7)   | -               |
| Thromboembolism                      | 1 (1.64)  | 1 (0.7)   | 0.51            |
| Renal disease                        | 3 (4.91)  | 2 (1.4)   | 0.16            |
| Smoking                              | 10 (16.4) | 24 (16.9) | 1.0             |
| Quit smoking during pregnancy        | 4 (6.56)  | 6 (4.2)   | 0.49            |
| Substance abuse                      | 4 (6.56)  | 11 (7.7)  | 1.0             |
| Antihypertensive medication<br>(Y/N) | 14 (23.0) | 47 (33.1) | 0.18            |
| 2 antihypertensive agents            | 4 (6.56)  | 6 (4.2)   | 0.49            |

Values reported as n (%) or mean  $\pm$  standard deviation.

ACOG: American College of Obstetricians and Gynecologists

BMI: Body mass index

**Table 2. Maternal Outcomes of Post-ACOG Patients Not Prescribed Aspirin vs Prescribed Aspirin**

|                                  | Post-ACOG (n=203)                   |                                  | Adjusted Odds Ratios      |
|----------------------------------|-------------------------------------|----------------------------------|---------------------------|
|                                  | Not Prescribed Aspirin (n = 61) 30% | Prescribed Aspirin (n = 142) 70% |                           |
| <b>Superimposed Preeclampsia</b> | 15 (24.6)                           | 57 (40.1)                        | 1.81 (0.90 – 3.64)        |
| Without severe features          | 4 (6.6)                             | 5 (3.5)                          | 0.44 (0.11 – 1.87)        |
| With severe features             | 11 (18.0)                           | 52 (36.6)                        | <b>2.36 (1.10 – 5.06)</b> |
| <b>Delivery Indications</b>      |                                     |                                  |                           |
| Completed 37 weeks               | 41 (67.2)                           | 90 (63.4)                        | 0.93 (0.48 – 1.80)        |
| Fetal indication                 | 7 (11.5)                            | 23 (16.2)                        | 1.50 (0.59 – 3.85)        |
| Lab abnormalities                | 1 (1.6)                             | 12 (8.5)                         | 7.45 (0.88 – 61.1)        |
| Uncontrolled severe BP           | 6 (9.8)                             | 30 (21.1)                        | 2.58 (0.98 – 6.78)        |
| Persistent maternal symptoms     | 0 (0)                               | 14 (9.9)                         | -                         |
| Spontaneous onset of labor       | 12 (19.7)                           | 19 (13.4)                        | 0.62 (0.27 – 1.43)        |
| Placental abruption              | 0 (0)                               | 4 (2.8)                          | -                         |
| Eclampsia                        | 0 (0)                               | 0 (0)                            | -                         |

|                                   |               |               |                           |
|-----------------------------------|---------------|---------------|---------------------------|
| HELLP Syndrome                    | 0 (0)         | 3 (2.1)       | -                         |
| Pulmonary edema                   | 0 (0)         | 1 (0.7)       | -                         |
| Magnesium at delivery             | 10 (16.4)     | 38 (26.8)     | 1.80 (0.81 – 4.03)        |
| <b>Mode of Delivery</b>           |               |               |                           |
| Cesarean                          | 21 (34.4)     | 73 (51.4)     | 0.55 (0.29 – 1.05)        |
| <b>Maternal Complications</b>     |               |               |                           |
| Postpartum hemorrhage             | 4 (6.6)       | 28 (19.7)     | <b>3.95 (1.28 – 12.3)</b> |
| Maternal ICU admission            | 0 (0)         | 2 (1.4)       | -                         |
| Maternal brain imaging            | 0 (0)         | 4 (2.8)       | -                         |
| Maternal mortality                | 0 (0)         | 0 (0)         | -                         |
| <b>Fetal Outcomes</b>             |               |               |                           |
| Antenatal steroids                | 11 (18.0)     | 28 (19.7)     | 0.81 (0.36 – 1.85)        |
| Intrauterine growth restriction   | 6 (9.8)       | 11 (7.7)      | 0.72 (0.23 – 2.21)        |
| Abnormal umbilical artery Doppler | 1 (1.6)       | 5 (3.5)       | 1.92 (0.20 – 18.5)        |
| Stillbirth                        | 1 (1.6)       | 1 (0.7)       | 0.13 (0.00 – 3.72)        |
| <b>Neonatal Outcomes</b>          |               |               |                           |
| Gestational Age at Delivery       | 37.1 +/- 2.87 | 36.6 +/- 3.30 | P = 0.99                  |
| PTD < 37                          | 12 (19.7)     | 41 (28.9)     | 1.66 (0.80 – 3.43)        |
| PTD <34                           | 5 (8.2)       | 20 (14.1)     | 1.84 (0.66 – 5.14)        |

|                |              |               |                    |
|----------------|--------------|---------------|--------------------|
| PTD <28        | 1 (1.6)      | 5 (3.5)       | 2.19 (0.25 – 19.1) |
| NICU Admission | 17 (27.8)    | 52 (17.6)     | 1.43 (0.72 – 2.84) |
| SGA            | 6 (9.8)      | 13 (9.2)      | 0.59 (0.19 -1.79)  |
| Birthweight    | 3031 +/- 650 | 3043 +/- 2588 | P = 0.83           |

Values reported as n (%) or mean  $\pm$  standard deviation. Adjusted odds ratios were calculated using logistic regression for binomial variables and linear regression for continuous variables, adjusting for maternal age and history of preeclampsia. For continuous variables, adjusted p-value was reported rather than odds ratios.

ACOG: American College of Obstetricians and Gynecologists; BP: Blood pressure; HELLP: hemolysis, elevated liver enzymes, low platelet count; ICU Intensive care unit; PTD: Incidence of preterm delivery, NICU: Neonatal intensive care unit. RDS: Respiratory distress syndrome; IVH: Intraventricular hemorrhage; NEC: Necrotizing enterocolitis. SGA: small for gestational age based on neonatal charts

<sup>a</sup> Uncontrolled severe BP is defined as not controlled after several intravenous doses of antihypertensive medications.

**Table 3. Demographic Characteristics of Patients with Superimposed Preeclampsia with Severe Features Only**

|                        | Superimposed Preeclampsia with Severe Features |                     | P-value         |
|------------------------|------------------------------------------------|---------------------|-----------------|
|                        | Pre ACOG<br>(n = 55)                           | Post ACOG<br>(n=63) |                 |
| Maternal age           | 33.1 +/- 5.84                                  | 32.2 +/- 6.43       | 0.40            |
| Race                   |                                                |                     |                 |
| • African American (2) | 31 (56.3)                                      | 44 (69.8)           | 0.18            |
| • White (1)            | 9 (16.4)                                       | 12 (19.0)           | 0.81            |
| • Hispanic (3)         | 1 (1.81)                                       | 5 (7.94)            | 0.21            |
| • Asian (4)            | 7 (12.7)                                       | 0 (0)               | <b>&lt;0.01</b> |
| • Other (5)            | 7 (12.7)                                       | 2 (3.17)            | 0.08            |
| Gravida                | 3.8 +/- 2.34                                   | 3.89 +/- 2.65       | 0.85            |
| Nulliparous            | 16 (29.1)                                      | 19 (30.2)           | 1.00            |
| Preterm birth          | 15 (27.3)                                      | 24 (38.1)           | 0.84            |
| BMI                    | 34.0 +/- 9.69                                  | 34.3 +/- 8.06       | 0.86            |

|                                   |                  |                  |                 |
|-----------------------------------|------------------|------------------|-----------------|
| Obesity (BMI > 30)                | 34 (61.8)        | 45 (71.4)        | 0.33            |
| History of preeclampsia           | 21 (38.2)        | 25 (39.7)        | 1.00            |
| Pregestational diabetes           | 8 (14.5)         | 9 (14.3)         | 1.00            |
| Thyroid disorders                 | 2 (3.64)         | 4 (6.35)         | 0.68            |
| Autoimmune disorder               | 2 (3.64)         | 4 (6.35)         | 0.68            |
| Renal disease                     | 4 (7.27)         | 2 (3.17)         | 0.42            |
| Smoking                           | 8 (14.5)         | 8 (12.7)         | 0.79            |
| Quit smoking during pregnancy     | 4 (7.27)         | 3 (4.76)         | 0.70            |
| Substance Abuse                   | 2 (3.64)         | 4 (6.35)         | 0.68            |
| Prescribed Aspirin                | 5 (9)            | 52 (82.5)        | <0.0001         |
| Antihypertensive medication (Y/N) | <b>35 (63.6)</b> | <b>19 (30.2)</b> | <b>&lt;0.01</b> |
| 2 antihypertensive agents         | 6 (10.9)         | 4 (6.35)         | 0.51            |

Values reported as n (%) or mean  $\pm$  standard deviation.

ACOG: American College of Obstetricians and Gynecologists

BMI: Body mass index

**Table 4. Maternal Outcomes of Patients with Superimposed Preeclampsia with Severe Features Only**

|                                     | Superimposed Preeclampsia with Severe Features |                  | Adjusted Odds Ratios      |
|-------------------------------------|------------------------------------------------|------------------|---------------------------|
|                                     | Pre ACOG (n = 55)                              | Post ACOG (n=63) |                           |
| <b>Delivery Indications</b>         |                                                |                  |                           |
| Completed 37 weeks                  | 13 (23.6)                                      | 29 (46.0)        | 1.92 (0.82 – 4.50)        |
| Fetal indication                    | 7 (12.7)                                       | 7 (11.1)         | 1.58 (0.35 – 3.82)        |
| Lab abnormalities                   | 4 (7.3)                                        | 12 (19.0)        | 2.94 (0.84 – 10.33)       |
| Uncontrolled severe BP <sub>b</sub> | 26 (47.3)                                      | 33 (52.4)        | 1.67 (0.75 – 3.72)        |
| Persistent maternal symptoms        | 15 (27.3)                                      | 14 (22.2)        | 0.77 (0.32 – 1.89)        |
| Spontaneous onset of labor          | 3 (5.5)                                        | 5 (7.9)          | 2.07 (0.43 – 9.94)        |
| Placental abruption                 | 4 (7.3)                                        | 3 (4.8)          | 0.72 (0.14 – 3.71)        |
| Eclampsia                           | 0 (0)                                          | 0 (0)            | -                         |
| HELLP Syndrome                      | 0 (0)                                          | 3 (4.8)          | -                         |
| Pulmonary edema                     | 1 (1.8)                                        | 1 (1.6)          | 0.87 (0.05 – 14.3)        |
| Magnesium at delivery               | 47 (85.5)                                      | 43 (68.3)        | 0.43 (0.16 – 1.12)        |
| <b>Mode of Delivery</b>             |                                                |                  |                           |
| Cesarean                            | 20 (36.4)                                      | 34 (54.0)        | <b>3.05 (1.30 – 7.14)</b> |



|                                   |              |              |                           |
|-----------------------------------|--------------|--------------|---------------------------|
| <b>Maternal Complications</b>     |              |              |                           |
| Postpartum hemorrhage             | 7 (12.7)     | 17 (27.0)    | 2.42 (0.87 – 6.70)        |
| Maternal ICU admission            | 2 (3.6)      | 2 (3.2)      | 0.91 (0.11 – 7.58)        |
| Maternal brain imaging            | 1 (1.8)      | 4 (6.3)      | 3.85 (0.38 – 39.0)        |
| Maternal mortality                | 0 (0)        | 0 (0)        | -                         |
| <b>Fetal Outcomes</b>             |              |              |                           |
| Antenatal steroids                | 20 (36.3)    | 19 (3.0)     | 1.28 (0.53 – 3.06)        |
| Intrauterine growth restriction   | 8 (14.5)     | 4 (6.3)      | 0.51 (0.13 – 1.91)        |
| Abnormal umbilical artery Doppler | 3 (5.5)      | 1 (1.6)      | 0.39 (0.04 – 4.22)        |
| Stillbirth                        | 4 (7.3)      | 1 (1.6)      | 0.22 (0.02 – 2.18)        |
| <b>Neonatal Outcomes</b>          |              |              |                           |
| Gestational Age at Delivery       | 34.7 +/- 3.6 | 35.4 +/- 3.5 | P = 0.92                  |
| PTD < 37                          | 35 (63.6)    | 33 (52.4)    | 0.63 (0.30 – 1.32)        |
| PTD < 34                          | 15 (27.3)    | 13 (20.6)    | 1.44 (0.61 – 3.78)        |
| PTD < 28                          | 3 (5.5)      | 2 (3.1)      | 1.76 (0.28 – 11)          |
| NICU Admission                    | 33 (60)      | 28 (44.4)    | 0.78 (0.35 – 1.73)        |
| SGA                               | 12 (21.8)    | 6 (9.5)      | <b>0.28 (0.10 – 0.82)</b> |
| Birthweight                       | 2330 +/- 908 | 2682 +/- 788 | P = 0.267                 |

Values reported as n (%) or mean  $\pm$  standard. Odds ratios were adjusted for a higher proportion of post-ACOG patients who received anti-hypertensive medications prior to delivery using logistic regression for binomial variables and linear regression for continuous variables. For continuous variables, adjusted p-values were reported rather than odds ratios.

ACOG: American College of Obstetricians and Gynecologists; BP: Blood pressure; HELLP: hemolysis, elevated liver enzymes, low platelet count; ICU Intensive care unit; PTD: Incidence of preterm delivery, NICU: Neonatal intensive care unit.

<sup>a</sup> Uncontrolled severe BP is defined as not controlled after several intravenous doses of antihypertensive medications.
